# Supplementary material for: Long non-coding RNA LINC01234 regulates proliferation, migration and invasion via HIF-2α pathways in clear cell renal cell carcinoma cells
Source: PeerJ. 2020 Oct 14;8:e10149. doi: 10.7717/peerj.10149 (PMC7568479; doi:10.7717/peerj.10149)
Supplement: Supplemental Information 2 — Compared with the normal tissues, a total of 1541 lncRNAs were identified as differentially expressed lncRNAs in tumor tissues (FDR < 0.05 and |logFC| > 2), including 1075 upregulated (logFC > 2) and 466 downregulated (logFC < −2) lncRNAs. [file peerj-08-10149-s002.xlsx]

## Sheet: Sheet1
NAME	logFC	FDR
LINC02121	-9.05975	5.94e-110
AC079310.1	-8.96422	6.68e-105
LINC02437	-8.62594	1.1e-256
LINC01055	-7.92238	8.37e-99
LINC01020	-7.21728	1.02e-103
AC124017.1	-7.02419	1.83e-71
AC009035.1	-6.80891	1.96e-153
AL121823.1	-6.80548	2.07e-93
LINC01983	-6.75518	4.4e-65
AL139280.1	-6.61298	5.3e-133
AC107057.1	-6.38948	5.84e-76
AC007993.2	-6.36036	8.49e-75
LINC01543	-6.35292	1.39e-71
AC067956.1	-6.30384	1.21e-111
AC023421.1	-6.27363	3.24e-81
AL121787.1	-6.21571	1.03e-62
AC092325.1	-6.14887	4.48e-57
AP000696.1	-5.99153	9.6e-78
LINC02380	-5.98563	4.48e-68
LINC01571	-5.91642	1.32e-150
AC092078.2	-5.87137	7.56e-145
LINC02343	-5.86703	1.42e-47
AC092813.2	-5.79517	6.35e-99
AL031726.1	-5.6879	1.18e-83
AC061975.7	-5.5348	2.86e-37
AP000697.1	-5.50936	2.61e-50
LINC00871	-5.49695	3.45e-45
AC005616.1	-5.49539	3.8e-76
LINC02149	-5.4895	1.27e-95
AC090709.1	-5.47896	1.91e-216
AC105999.2	-5.44167	1.79e-32
AL358876.2	-5.39396	3.24e-105
AC062015.1	-5.37909	1.56e-83
AC026782.2	-5.24138	4.71e-54
LINC01762	-5.19723	1.47e-50
LINC01976	-5.10045	3.91e-107
AC019254.2	-5.09724	2.41e-56
AC068631.1	-5.07105	3.15e-49
AC099552.3	-5.06873	2.2e-38
AC024022.1	-5.04234	3.91e-65
AC104777.2	-5.03082	3.08e-87
BMPR1B-AS1	-5.02969	1.97e-86
AC093525.4	-5.02106	2.05e-100
AL390294.1	-5.01846	8.47e-35
LINC00864	-5.00686	1.76e-155
LINC02267	-4.98816	5.92e-34
AC010163.1	-4.98309	7.05e-71
AL451062.1	-4.9134	3.36e-50
AL162725.2	-4.90926	1.13e-61
LINC01665	-4.84855	9.45e-37
GATA3-AS1	-4.84163	5.15e-67
AC084866.1	-4.812	9.81e-57
AC108860.2	-4.80491	1.59e-34
AC079340.2	-4.78996	1.18e-77
AC243773.2	-4.66178	1.66e-22
AP005229.1	-4.64273	6.36e-38
AC040963.1	-4.56391	3.55e-43
FOXCUT	-4.55954	1.92e-53
AC027309.1	-4.54321	2.32e-53
LINC00982	-4.53761	8.55e-144
AC138024.1	-4.53061	9.9e-60
AL354863.1	-4.46869	1.29e-56
AC006441.4	-4.46453	2.23e-122
LINC00379	-4.38855	1.69e-28
AC093627.7	-4.34481	1.46e-35
AC104564.5	-4.32722	4.38e-44
AC037450.1	-4.30089	1.57e-54
LINC02172	-4.2821	6.71e-36
AC104237.2	-4.25169	1.63e-43
Z93403.1	-4.24369	5.45e-54
FAM167A-AS1	-4.24053	1.3e-29
CCDC39-AS1	-4.16562	2.52e-63
PTCSC3	-4.14394	8.46e-34
AC093732.1	-4.14187	1.08e-93
AC010641.1	-4.13904	2.1e-52
LINC01831	-4.13555	7.12e-52
LLPH-AS1	-4.10835	2.11e-65
AL512328.1	-4.09639	2.2e-36
AC019080.1	-4.04683	8.7e-21
AL359094.2	-4.03333	2.86e-26
AC016526.1	-4.0049	2.8e-73
CYMP-AS1	-3.99197	4.45e-24
AC007495.2	-3.96481	2.77e-45
AL161668.3	-3.94917	2.37e-27
PROX1-AS1	-3.94282	2.29e-45
LINC00461	-3.9146	3.26e-22
AC080129.1	-3.89885	8.33e-41
AP003174.1	-3.86118	1.5e-39
AP001453.1	-3.85124	9.72e-51
AL135785.1	-3.84183	1.76e-23
LINC01606	-3.84058	9.51e-51
AC074250.2	-3.83814	2.08e-28
AC105094.2	-3.82966	9.27e-35
LINC00473	-3.82869	5.9e-16
AC011239.1	-3.82662	3.22e-28
AC106894.1	-3.82609	1.16e-30
LINC00551	-3.82527	6.42e-107
WSPAR	-3.81599	8.58e-57
AC007342.4	-3.7927	1.29e-25
AC018541.1	-3.78886	1.7e-22
CHL1-AS2	-3.78008	2.99e-39
AC011297.1	-3.77536	3.55e-52
AC018814.1	-3.76538	2.41e-42
AL136088.1	-3.73953	5.38e-33
AL049555.1	-3.72753	9.05e-16
SSTR5-AS1	-3.71495	2.83e-60
AC084211.1	-3.71348	6.03e-21
LINC00410	-3.69892	1.7e-44
LINC01785	-3.69533	5.76e-44
LINC00477	-3.66195	1.5e-25
AC093714.1	-3.65884	9.76e-24
AC093496.1	-3.65001	6.14e-20
AL163932.1	-3.63464	3.39e-50
LINC01833	-3.63462	1.61e-42
LINC00443	-3.61351	1.12e-26
LINC01819	-3.55482	4.54e-22
LINC02061	-3.54438	3.7e-44
AL591624.1	-3.53709	1.52e-24
AC008264.2	-3.52666	1.39e-22
AL035661.1	-3.52028	5.49e-57
RRS1-AS1	-3.51986	5.69e-25
AC100860.1	-3.51617	3.73e-71
PSD2-AS1	-3.50203	2.23e-30
AP006333.2	-3.48791	4.29e-21
CR383656.11	-3.48748	3.65e-17
AL392089.1	-3.47526	2.34e-24
AC005082.1	-3.46884	2.21e-27
AC128707.1	-3.46878	5.65e-23
AC020651.1	-3.46412	2.59e-23
AC135068.7	-3.45943	1.87e-29
LINC00380	-3.44353	1.07e-18
AC021491.4	-3.43585	5.67e-23
AC121764.2	-3.40614	1.18e-31
LINC01544	-3.40558	1.18e-16
AC087525.1	-3.40054	4.35e-20
AC011939.3	-3.39622	5.83e-25
WT1-AS	-3.38371	2.9e-28
MIR200CHG	-3.37621	2.62e-16
LINC00645	-3.3718	4.66e-56
C15orf56	-3.36368	3.19e-16
AP005131.3	-3.363	8.64e-33
AC027288.3	-3.36193	1.04e-29
NAV2-AS3	-3.34755	3.96e-33
AC107220.1	-3.31849	1.72e-50
LINC-PINT	-3.3094	4.29e-47
LINC01702	-3.30928	4.18e-24
LINC01432	-3.30219	4.23e-28
AC119424.1	-3.26531	1.94e-22
C3orf67-AS1	-3.25986	4.79e-23
AC108156.1	-3.25871	1.09e-19
AC016383.1	-3.25102	1.52e-29
AC104984.4	-3.24779	2.7e-22
AL133279.3	-3.24573	7.26e-24
UG0898H09	-3.24431	1.24e-16
AL590426.2	-3.23133	7.42e-27
LINC00955	-3.231	2.9e-13
AL139039.3	-3.21905	9.41e-17
AC073343.2	-3.21018	3.17e-56
AC006058.3	-3.20374	8.56e-14
AC124067.1	-3.20097	1.58e-17
LINC01658	-3.19646	3.97e-52
PLS3-AS1	-3.19531	1.94e-18
AP000281.2	-3.19438	1.72e-34
AC074033.2	-3.18983	1.01e-18
LINC01874	-3.18714	3.26e-16
AL117382.1	-3.18358	4.78e-15
AC093802.1	-3.17843	1.59e-15
AC008742.1	-3.16822	2.73e-46
AC025280.1	-3.16433	4.21e-22
AC010198.1	-3.1636	6.35e-26
AL109933.1	-3.1619	4.13e-38
AC099684.1	-3.14733	2.9e-38
AC083841.1	-3.14542	6.39e-23
AC104012.1	-3.13801	8.15e-46
AC087762.1	-3.1176	8.52e-16
AC104667.1	-3.11281	1.82e-22
AL450313.1	-3.10731	1.39e-31
AC011700.1	-3.09812	9.6e-38
AC093904.2	-3.0975	8.94e-10
AC068473.4	-3.09024	3.12e-47
AL731684.1	-3.08709	4.1e-19
AC139795.3	-3.07343	9.64e-72
AC022893.2	-3.07333	1.36e-20
AC022431.2	-3.07131	1.22e-22
AL031710.1	-3.06396	4.58e-16
LINC02432	-3.0558	1.78e-13
CLDN10-AS1	-3.05254	8.88e-24
AC074044.1	-3.04576	9.87e-23
AC103563.7	-3.03717	7.92e-47
AL355102.4	-3.03422	3.05e-11
AL157834.2	-3.01992	1.09e-36
AC139712.3	-3.01458	3.89e-32
AC005722.2	-3.0126	3.25e-16
AP001046.1	-3.00295	4.33e-19
AC004870.4	-3.00227	7.56e-14
AL353746.1	-2.99878	1.06e-17
LINC02410	-2.99215	1.2e-53
AC090001.1	-2.99127	9.17e-18
BX547991.1	-2.98927	3.48e-13
AC046195.1	-2.97417	4.23e-28
MEIS1-AS3	-2.96515	2.01e-41
AL513283.1	-2.96403	5.85e-15
AC010307.4	-2.95609	9.8e-17
AC002401.1	-2.95267	6.41e-32
BX255923.1	-2.95149	2.42e-13
AC013727.2	-2.9321	2.37e-16
LINC02360	-2.93199	7.53e-15
AC022726.1	-2.92849	1.13e-17
AC104407.1	-2.92024	1.31e-16
AC026471.3	-2.90836	1.06e-16
AC241644.2	-2.89535	2.78e-68
MIR663AHG	-2.89324	2.85e-12
AC079385.3	-2.89132	5.89e-20
AC130371.2	-2.88147	2.07e-16
AC108174.1	-2.87694	2.66e-13
LINC01756	-2.87205	7.85e-24
LINC02006	-2.87107	4.83e-23
AL390760.1	-2.85861	6.4e-20
LINC02318	-2.84761	7.6e-26
AC005165.1	-2.82588	2.8e-15
AL121830.1	-2.82103	4.37e-19
CALML3-AS1	-2.80869	4.47e-12
AC026124.1	-2.80118	1.1e-15
LINC02350	-2.7998	3.24e-21
AC090673.1	-2.79788	1.79e-49
AC019197.1	-2.7923	1.02e-14
AL158071.3	-2.78045	3.13e-30
AL020994.2	-2.77745	2.87e-08
AC069366.2	-2.77308	1.72e-16
AC099794.1	-2.77232	1.29e-21
AC022211.2	-2.77059	2.31e-74
LINC02012	-2.76709	1.12e-25
AP003066.1	-2.76595	1.68e-49
AC110813.1	-2.75984	8.18e-30
AC092720.2	-2.75912	7.37e-17
NTM-AS1	-2.75874	2.5e-15
LINC01684	-2.75551	2.27e-21
LINC01317	-2.75139	7.49e-20
AC026462.3	-2.75015	5.53e-11
LINC02294	-2.73655	6.5e-08
AL035415.1	-2.73516	1.02e-18
AL359317.2	-2.72463	3.59e-51
AC087379.2	-2.72069	2.86e-12
FAM3D-AS1	-2.71822	9.17e-40
MUC2	-2.71372	6.22e-22
AC010501.1	-2.71346	1.4e-12
HOXB-AS3	-2.71159	1.09e-08
AC135178.1	-2.70924	4.19e-31
AL391869.1	-2.70709	3.67e-14
AL133163.2	-2.69511	8.92e-16
AC010163.2	-2.69411	3.42e-20
AC007938.4	-2.69251	4.12e-19
AL158847.1	-2.69197	2.2e-55
LINC00845	-2.69097	2.54e-64
PP7080	-2.67723	1.01e-10
AC017053.1	-2.66658	2.63e-15
CASC18	-2.66545	3.56e-60
AL121999.1	-2.66186	2.74e-18
AC025271.4	-2.66057	6.84e-16
AC025811.1	-2.64601	1.71e-09
TSSC1-IT1	-2.64087	5.66e-14
AC090985.1	-2.64071	5.45e-19
AC105398.1	-2.63543	2.14e-09
ITPKB-AS1	-2.63241	2.31e-25
AL353699.1	-2.63183	1.15e-08
AP000915.2	-2.62466	1.46e-19
AC020978.5	-2.62049	1.23e-11
AC087439.1	-2.61452	4.99e-13
AL357314.1	-2.61427	5.97e-19
AC026434.1	-2.61367	5.24e-09
AC087392.2	-2.60893	1.38e-17
AC025431.1	-2.60744	2.57e-12
AL050327.1	-2.60239	5.01e-10
AL020994.1	-2.60129	3.76e-08
ENO1-IT1	-2.59888	5.19e-21
AP003419.1	-2.59497	1.64e-18
AL160286.3	-2.5841	9.75e-46
AL162727.1	-2.58146	1.34e-16
DLG1-AS1	-2.57979	2.3e-31
AL137071.1	-2.57393	3.06e-23
AC110079.2	-2.57141	1.61e-20
LYPLAL1-AS1	-2.56116	8.57e-14
AC026414.1	-2.55804	3.69e-19
AC091736.1	-2.55249	1.67e-17
AL031123.1	-2.55147	4.71e-20
AL133320.1	-2.53937	4.22e-21
AC069120.1	-2.53638	4.2e-09
LINC00652	-2.53271	2.48e-14
AC245748.3	-2.53029	8.2e-19
AC104435.2	-2.52601	4.23e-28
LINC02292	-2.52513	7.14e-13
AC117522.2	-2.52453	7.26e-11
AC091965.4	-2.52397	3.51e-21
AL117382.2	-2.52314	4.2e-14
PWRN1	-2.52184	4.56e-08
TCL6	-2.52065	4.85e-10
AL137793.1	-2.51849	1.89e-18
AL121796.1	-2.518	3.94e-17
AC023824.6	-2.50793	5.81e-22
AC093583.1	-2.50772	9.43e-07
AL391261.2	-2.50415	7.71e-21
AC103563.2	-2.49743	3.42e-15
AL023806.1	-2.4967	4.01e-20
AC079801.1	-2.49284	1.71e-09
LINC01659	-2.49161	6.31e-13
AL512357.1	-2.48469	1.35e-08
CNOT10-AS1	-2.48401	1.88e-13
AC013460.1	-2.48252	1.84e-11
AC009542.1	-2.46564	4.22e-55
LINC01739	-2.45997	7.8e-17
AC107067.1	-2.45718	4.15e-12
LINC01159	-2.45691	8.42e-08
CSPG4P1Y	-2.45594	4.67e-11
CHRM3-AS2	-2.4557	2e-24
ATP2A1-AS1	-2.44735	7.03e-31
AL157373.2	-2.4342	1.47e-11
LINC01589	-2.43194	7.37e-12
AC113349.1	-2.43002	6.1e-16
LINC01896	-2.42575	8.04e-15
AC006116.4	-2.41547	1.18e-33
RNF157-AS1	-2.41351	1.1e-16
LMO7-AS1	-2.4122	2.85e-43
AC098828.3	-2.40923	3.75e-08
AL078601.2	-2.40782	1.57e-20
AC025253.1	-2.40526	2.5e-14
AC104590.1	-2.39869	4.99e-13
LINC01968	-2.39795	3.1e-09
AC138028.5	-2.39317	6.53e-26
AC130324.3	-2.39308	1.54e-07
AC130456.4	-2.39069	1.1e-08
LINC01979	-2.38991	1.39e-26
AL162419.1	-2.38905	1.77e-10
AL445686.2	-2.38875	9.4e-15
LINC02303	-2.38635	1.72e-06
FAM215A	-2.38421	3.53e-37
AC095060.1	-2.38139	4.49e-21
ARHGEF26-AS1	-2.37658	1.24e-21
P4HA3-AS1	-2.37434	8.97e-31
AC010205.1	-2.36228	1.95e-11
LINC01332	-2.36061	2.61e-07
AL353801.1	-2.35761	2.22e-08
AC016292.1	-2.3569	5.41e-11
GLIS3-AS1	-2.35193	6.53e-12
AL021068.1	-2.35133	1.98e-28
GAS1RR	-2.34928	3.91e-12
AC099313.1	-2.3471	6.25e-15
AC138965.1	-2.34501	4.24e-26
AC099684.2	-2.34457	1.76e-24
AL713851.1	-2.34196	7.79e-20
AC074257.1	-2.34133	1.35e-18
AP003472.2	-2.34057	3.72e-15
AC117498.2	-2.33907	2.21e-10
AC079467.1	-2.33231	3.85e-12
BVES-AS1	-2.33094	1.3e-10
AC025470.2	-2.3263	1.16e-10
AC004485.1	-2.32357	7.82e-07
AC013714.1	-2.32245	1.51e-12
LINC00323	-2.32154	1.27e-33
LINC01337	-2.31992	7.11e-24
LINC02381	-2.31463	7.27e-06
LINC02211	-2.31125	5.29e-30
AL358333.1	-2.30518	6.34e-10
LINC01788	-2.30102	1.4e-07
C15orf59-AS1	-2.3008	1.86e-05
SLC25A5-AS1	-2.29554	1.43e-07
AC090774.4	-2.29547	1.4e-14
AL731574.1	-2.28452	1.57e-14
LINC01014	-2.28291	1.35e-07
AC034229.1	-2.28273	6.82e-13
LINC01065	-2.27971	3.73e-07
AC122108.1	-2.27675	1.1e-12
ST3GAL6-AS1	-2.26573	5.33e-08
AC106799.1	-2.26287	3.88e-11
AC026469.1	-2.26207	2.25e-09
AC091976.1	-2.2609	6.13e-12
LINC02324	-2.26024	2.24e-10
AL122058.1	-2.25965	1.77e-20
AC133552.6	-2.25328	1.13e-24
AC137723.1	-2.25003	3.18e-09
TMEM246-AS1	-2.24865	7.18e-08
AL359815.1	-2.24794	4.44e-16
AP003110.1	-2.2478	1.31e-08
AL031432.1	-2.247	2.85e-11
AC003985.1	-2.24515	3.94e-17
LINC00608	-2.24456	8.07e-11
AC148477.2	-2.24154	2.79e-06
MRGPRF-AS1	-2.23099	4.66e-08
AC103957.2	-2.22656	9.05e-16
AC034243.1	-2.22208	5.41e-09
AC008738.6	-2.21754	1.68e-13
AC004882.1	-2.21349	2.37e-19
AC004066.2	-2.21206	2.48e-11
LINC01136	-2.20899	5.56e-29
AL031429.2	-2.20871	4.31e-06
AC091965.1	-2.20774	1.74e-54
AC117505.1	-2.20626	4.04e-13
AC009102.2	-2.20348	2.28e-08
AL024508.2	-2.20217	6.13e-08
AL137025.1	-2.19985	3.36e-13
AL078590.3	-2.19831	4.54e-24
AL390036.1	-2.19279	3.89e-18
AC007996.1	-2.19033	4.77e-06
LINC00644	-2.18836	6.78e-09
AL121852.1	-2.18636	8.32e-20
C10orf71-AS1	-2.18518	9.8e-06
AC128687.2	-2.17719	1.9e-08
AC020779.2	-2.17567	2.49e-13
AP000851.2	-2.17365	5.77e-05
AC138305.1	-2.1698	2.03e-09
AC106738.2	-2.16454	7.21e-09
AL136311.1	-2.16182	1.54e-29
AL356740.3	-2.16133	1.57e-07
AC068870.2	-2.16061	4.22e-38
GCSAML-AS1	-2.15812	2.17e-20
AL031123.2	-2.15205	1.14e-06
SOX2-OT	-2.15091	9.1e-19
DANCR	-2.15009	5.97e-05
AC022079.2	-2.1481	1.25e-34
LNX1-AS2	-2.13696	2.55e-08
LINC01987	-2.13662	2.5e-06
AC148477.4	-2.13497	9.99e-19
AL928921.1	-2.11816	4.69e-12
AL022069.1	-2.11782	2.04e-30
AC017091.1	-2.11616	1.16e-11
AC009123.1	-2.11606	4.16e-19
LINC01076	-2.11063	4.18e-13
A2ML1-AS1	-2.10439	5.5e-13
AC040174.1	-2.10123	1.23e-05
CATIP-AS2	-2.09967	1.45e-07
AC010336.2	-2.09695	3.18e-14
AL031275.1	-2.09411	3.03e-10
AL110292.1	-2.09026	1.17e-07
LINC00472	-2.0885	4.62e-30
TUB-AS1	-2.08486	1.28e-06
LINC00326	-2.08186	3.33e-13
AL512347.1	-2.07906	1.53e-08
AC123786.1	-2.07745	2.86e-12
AL590128.2	-2.07725	7.65e-09
AF067845.2	-2.0763	2.62e-09
AL356218.1	-2.07312	2.26e-10
AP005136.2	-2.06886	9.52e-23
AC026888.1	-2.06286	2.08e-06
IQCF5-AS1	-2.05932	4.1e-10
F10-AS1	-2.05422	2.32e-31
AL353719.1	-2.05229	9e-09
AC010329.1	-2.05119	1.25e-14
LINC02417	-2.05072	1.03e-17
Z93022.1	-2.04321	3.21e-12
AL118508.1	-2.04224	2.17e-35
AC099329.1	-2.04193	1.95e-08
AC090206.1	-2.04129	4.79e-08
AC073591.1	-2.04005	3.81e-13
AC138956.1	-2.03547	3.91e-26
LINC01099	-2.03295	5.8e-06
PCAT18	-2.03244	3.75e-07
AL022344.2	-2.0282	2.7e-46
AC004080.4	-2.02705	1.31e-07
AL441989.1	-2.02071	1.4e-11
AP005717.1	-2.01965	1.38e-08
LINC01503	-2.01672	8.97e-05
AC007938.1	-2.01435	1.22e-24
AC009185.1	-2.008	9.11e-09
AL118522.1	-2.00432	1.21e-06
AC078850.2	-2.00275	9.22e-06
AL353152.1	-2.00132	3.61e-20
LINC02159	-2.00104	4.58e-22
AC113385.1	2.00077	2.8e-05
AC004448.4	2.0025	0.000595198
TTTY3B	2.00261	0.00239663
AC010776.3	2.00305	0.0306863
AC005785.1	2.0032	1.41e-08
AC098936.1	2.00393	1.87e-10
AL356130.2	2.00452	0.00075489
AC010457.1	2.00481	1.17e-15
AC108159.1	2.00487	1.91e-05
AC092957.1	2.00679	0.000448735
AL132655.1	2.00707	2.86e-06
AC092653.1	2.00807	1.27e-20
AL450306.1	2.0094	5.73e-14
AC107391.1	2.00984	1.18e-07
AC092809.4	2.0105	0.000760888
AC004264.1	2.01279	0.000711526
AC010982.1	2.01326	4.22e-05
LINC00528	2.01398	3.38e-07
LINC00427	2.01458	5.45e-06
AP001604.1	2.01597	0.00355422
AL163636.1	2.01681	0.000951296
Z98885.2	2.01757	6.75e-08
AC002464.1	2.01766	2.13e-05
AC007785.3	2.01825	0.00110705
LINC01997	2.01843	0.000145012
AC006557.1	2.02009	9.92e-06
AC009704.2	2.02097	0.000371762
AP001099.1	2.02178	0.000808541
AC012236.1	2.02194	1.34e-07
AF127936.1	2.02349	0.00195399
LINC01385	2.02413	0.0036283
LINC01502	2.02431	0.00594303
LINC01268	2.02448	6.31e-06
AC012081.1	2.02661	0.00146465
AC096711.3	2.02679	3.83e-05
AL133330.1	2.0269	0.000672343
AC009558.2	2.02837	1.98e-09
AC004253.2	2.02909	4.1e-07
SLCO4A1-AS1	2.02923	0.00325359
AC027601.1	2.0295	0.00279205
AC007728.2	2.03034	1.29e-08
AL445493.2	2.03105	2.26e-06
AC110015.1	2.03117	9.2e-09
PTPRVP	2.03203	4.68e-05
AL358972.1	2.03343	1.27e-07
AL138963.1	2.03379	9.16e-05
AC092332.1	2.03421	2.2e-05
AC079354.1	2.03438	2.31e-08
AC004543.1	2.03539	2.61e-06
AC024224.2	2.03677	2.57e-05
AC003984.1	2.03747	0.00565131
AL031848.2	2.03751	0.00939751
AC091887.1	2.03785	0.000371605
AP003119.1	2.03848	4.98e-06
AC022196.1	2.03868	3.09e-05
LINC01820	2.03887	2.81e-05
AL161756.1	2.03995	0.00010712
LINC01480	2.04125	4.82e-08
AC055855.2	2.04172	6.12e-18
AC026991.1	2.04198	8.02e-06
AP003469.2	2.0429	2.87e-09
LINC02403	2.04368	3.07e-06
AP000459.1	2.04406	2.99e-10
AC133528.1	2.04597	3.41e-12
AC122136.1	2.04657	0.000847817
LINC01150	2.04742	8.04e-08
AC007950.1	2.04763	0.00152311
AC245884.8	2.048	0.000447168
FAM13A-AS1	2.04821	3.4e-08
AL512310.2	2.04851	0.000327199
AC105411.1	2.04956	0.00149614
AC025171.4	2.05099	0.00224487
AL157871.2	2.05165	0.00146728
AP000763.3	2.05201	1.21e-05
AC027613.1	2.05243	1.51e-08
AC010973.1	2.05306	2.52e-07
LINC01012	2.05484	9.12e-05
AC109446.3	2.05505	0.000578163
LINC00426	2.05555	0.000220936
AC061975.8	2.05629	2.42e-07
AP000851.1	2.05678	2.25e-08
AC032011.1	2.0583	4.83e-11
ELMO1-AS1	2.05832	1.51e-08
MAFA-AS1	2.05836	0.00367098
AL008723.3	2.05865	0.000703965
AL049637.1	2.0594	0.00152476
AL031594.1	2.06096	0.000647069
AL136982.6	2.06808	0.000324697
AC068726.1	2.06861	1.71e-09
DPYD-IT1	2.0694	1.8e-06
AC024592.1	2.07044	1.43e-05
AL049649.1	2.07082	0.0012835
AC136604.2	2.0727	0.00119048
AC012668.3	2.07367	8.88e-07
AC103982.1	2.07381	2.34e-07
LINC00894	2.07482	1.41e-10
AC091185.1	2.07507	0.000407575
AC073188.6	2.07523	7.89e-06
AC005912.2	2.07529	1.45e-05
AC120498.2	2.078	1.11e-05
AC078883.1	2.07905	9.34e-21
AL590004.4	2.08071	0.00544869
AC044840.1	2.08111	6.42e-08
AC022447.5	2.08209	9.07e-08
AC116914.2	2.08396	0.000173335
AC090844.3	2.08545	0.00105582
AC108462.1	2.08584	0.000613973
AC012615.4	2.08604	0.00137974
AC012363.2	2.08679	0.000105258
AC104532.2	2.08776	1.78e-07
AC137794.1	2.08953	1.76e-06
AC005072.1	2.09065	4.43e-12
AC111149.2	2.0917	1.91e-08
HCG27	2.09203	1.19e-31
FGF12-AS3	2.09281	6.82e-13
CR559946.2	2.09625	0.000132848
UNQ6494	2.09664	3.21e-05
AC000036.1	2.09811	0.000758729
AC131210.1	2.09942	2.89e-05
AC134349.1	2.09943	6.95e-05
AC073370.1	2.09976	9.98e-06
AC005150.1	2.10061	0.000338363
AC105446.1	2.10108	0.000397791
AC090772.1	2.10209	5.61e-09
AC090282.1	2.1025	2.83e-18
LINC01925	2.10466	1.43e-06
AC093732.2	2.10483	9.26e-22
AF111169.4	2.10633	5.4e-17
LIMS1-AS1	2.1072	6.38e-05
AC087164.1	2.10851	3.61e-09
AC011891.1	2.10888	0.000283031
AC090578.1	2.10903	0.00137042
AC005006.1	2.10957	0.000400668
YEATS2-AS1	2.11059	0.00281563
NFIA-AS1	2.11188	1.05e-09
SALRNA2	2.11252	0.000109395
AC002064.1	2.11281	2.08e-05
LINC01746	2.11461	0.00110773
AC011466.3	2.11589	2.42e-08
AC009501.1	2.11592	0.00172164
AC124854.1	2.11623	0.00525369
AC092071.1	2.11682	6.99e-06
AC092718.6	2.11755	0.000508085
AP001360.1	2.11799	3.92e-08
NRIR	2.12006	0.000447268
AC017067.1	2.12045	3.39e-05
PHKA2-AS1	2.12102	0.000145012
PCED1B-AS1	2.12126	0.000515264
AC234582.2	2.12226	6.01e-08
TBL1XR1-AS1	2.12553	7.2e-06
AC010261.2	2.12789	2.88e-07
AC079763.1	2.1284	2.96e-09
LINC02465	2.12864	0.00100774
AC008752.1	2.12939	7.47e-09
AL136984.1	2.13212	1.23e-05
AC005387.1	2.13233	4.22e-05
AC096588.1	2.13246	0.000298912
AC005344.1	2.13316	2.89e-07
LINC02078	2.13491	7.61e-06
AC092535.3	2.13534	1.8e-07
BX005040.1	2.13783	1.34e-05
Z82249.1	2.13854	0.000145528
FOXC2-AS1	2.13939	0.000477136
LINC02015	2.14033	0.00548055
BX005214.1	2.1418	3.97e-06
AP003718.1	2.14245	0.000671758
AC068196.1	2.1425	5.05e-10
AL513128.1	2.14574	2.97e-06
AP001065.1	2.14747	0.00111139
AC078955.1	2.14824	1.94e-08
LINC02363	2.15002	0.00082453
AC091544.6	2.15049	9.31e-06
AC018553.1	2.15065	0.00124194
AL589678.1	2.15138	1.13e-09
AC022898.1	2.15158	0.000165612
C20orf197	2.15214	5.15e-08
SMIM25	2.15254	0.000943456
AC087564.1	2.153	0.0022054
LINC01141	2.15478	6.59e-08
AC018904.2	2.15666	1.11e-08
AC012645.4	2.15739	2.15e-08
AL008636.1	2.15766	8.11e-08
AC012485.1	2.15907	0.000397791
AP005899.1	2.1614	8.56e-09
NARF-IT1	2.16179	1.21e-08
AL662884.1	2.16234	2.54e-05
AC026369.3	2.16541	2.18e-21
LINC01522	2.16558	2.25e-05
LINC00412	2.16683	5.24e-05
AC002375.1	2.17002	0.000749185
AC007728.3	2.17077	5.54e-19
AC140847.1	2.17178	2.67e-07
AC026765.1	2.17194	1.57e-06
AL596442.2	2.17336	0.000167329
AC138305.2	2.17434	9.04e-05
AL354989.1	2.17562	1.4e-07
AP001056.1	2.17667	0.000281751
TRG-AS1	2.17753	0.00141408
DIO2-AS1	2.18077	0.00849985
AC005186.1	2.1811	9.35e-06
AC006372.2	2.18127	1.41e-10
AC005740.4	2.18184	4.83e-11
AC018692.1	2.18334	2.97e-10
AL121672.1	2.18383	8.95e-11
AC024937.3	2.18441	0.00054176
AC015878.1	2.18576	9.11e-05
LINC02362	2.18614	8.08e-09
AC004771.4	2.18709	0.000350654
AC004847.1	2.18974	0.00138639
AC004263.2	2.19049	5.76e-05
AC066595.1	2.19078	3.63e-05
AC008080.3	2.19134	2.59e-05
AC078842.1	2.19452	7.22e-06
AC009139.1	2.19496	0.000725858
AL137191.1	2.19546	2.15e-05
AC005529.1	2.1961	5.91e-06
KCNK4-TEX40	2.19706	0.00195103
LINC00293	2.19763	4.43e-07
AL365181.3	2.19808	0.00126952
AL645634.1	2.19819	4.85e-10
AC020658.4	2.19997	0.000413605
AC000032.1	2.20142	1.45e-06
HM13-IT1	2.20251	3.05e-07
ZBTB46-AS1	2.20327	0.000331747
AC015819.2	2.2039	0.000447685
C15orf54	2.20497	1.76e-05
C1orf147	2.20671	4.11e-09
AP001599.1	2.20796	0.000169621
AC018450.2	2.20952	0.000219413
AC090227.2	2.21079	4.52e-11
LINC01857	2.2109	0.000392564
LINC02418	2.21126	0.00150831
AC093157.2	2.2117	5.47e-10
AC079915.1	2.21222	0.000837903
PHACTR2-AS1	2.21224	5.83e-05
AC010486.2	2.21286	6.48e-09
U62317.5	2.21301	5.25e-06
AL022322.1	2.21406	0.00226078
AL035404.2	2.21457	0.000881908
AC079298.1	2.21551	0.00251054
LINC01067	2.21631	7.08e-07
ARHGAP26-IT1	2.21662	1.21e-13
AC020913.2	2.21755	1.76e-05
AC004817.1	2.21889	0.000889829
AC044791.1	2.21893	1.91e-07
AC092484.1	2.21947	4.7e-06
AL353597.1	2.22242	1.76e-05
LINC01559	2.22365	0.0240368
PVT1	2.2238	4.04e-38
AL353997.6	2.2246	4.92e-09
AP000550.2	2.22476	1.89e-07
LINC02395	2.22677	0.000951296
AC008555.2	2.23288	0.00032996
Z98884.1	2.23318	1.23e-16
AC087749.1	2.23424	1.53e-06
LINC00861	2.23515	0.00424087
AC120498.6	2.23574	2.59e-07
LINC01119	2.23734	3.19e-05
AC099506.1	2.2402	1.62e-05
AL139807.1	2.24065	2.99e-09
AC016773.1	2.24074	0.000329603
AC132872.3	2.24079	3.41e-06
AC096746.1	2.24087	7.03e-08
LINC01934	2.24146	0.00037752
AL590999.1	2.24247	0.00485776
AL356356.1	2.24258	0.000500148
AC067945.3	2.24263	0.000231314
AC079630.2	2.24291	2.3e-11
AC104688.1	2.24292	2.22e-05
AL031733.2	2.24323	0.0002267
AL161935.1	2.24475	8.56e-05
AL356259.1	2.24955	0.000462914
AC006064.1	2.25208	0.000151188
LINC02280	2.25285	8.04e-05
AC133961.1	2.2529	0.000121799
AC005692.1	2.25347	2.96e-11
AL929601.1	2.25509	0.000840564
AC007639.1	2.25529	0.000920894
AP003062.1	2.25612	0.00558054
AC011899.2	2.25682	1.34e-05
CFLAR-AS1	2.26171	0.000945889
LINC00678	2.26202	0.00058944
AC005253.1	2.26317	7.95e-23
AL133325.2	2.26359	1e-05
AC080078.1	2.2641	8.18e-09
AC005306.1	2.26642	0.000130738
AL445649.1	2.26671	4.56e-08
AC125494.3	2.26859	4.74e-11
LINC01094	2.2699	0.000282958
AC093484.2	2.27003	6.2e-05
TBX18-AS1	2.27224	3.73e-11
AC060234.2	2.27228	0.000267639
AC027601.4	2.27269	0.000369286
TSPEAR-AS2	2.27358	1.05e-08
AP001381.1	2.27418	0.000351168
AP003557.1	2.2767	0.000410822
AC018878.1	2.27737	1.7e-05
AC011389.2	2.28118	0.000108658
AC109495.1	2.28132	0.000200366
AL133255.1	2.2829	0.000149797
AC018638.6	2.28403	1.71e-21
AP001180.1	2.28461	0.000284899
ARAP1-AS2	2.28532	4.27e-05
TNK2-AS1	2.28738	4.16e-45
LINC01260	2.28835	0.000139139
ANKRD44-IT1	2.28907	9.12e-05
AL162231.4	2.28933	7.83e-15
AC087386.1	2.29007	7.81e-11
CSNK1G2-AS1	2.29042	9.09e-05
AC093858.1	2.29167	9.12e-09
ANKRD33B-AS1	2.29394	0.00011633
AC036101.1	2.29445	9.82e-06
LINC01616	2.29482	2.35e-06
AC016493.1	2.2972	2.15e-06
AC138969.3	2.29858	9.32e-09
AP005131.1	2.29956	0.000207035
AC092660.1	2.30033	0.000565449
TDRG1	2.30244	0.000446536
LINC01748	2.30403	0.000101567
WNT5A-AS1	2.30445	6.11e-07
TTLL7-IT1	2.30514	0.000326575
AL355483.1	2.30543	0.0001
AL117335.1	2.30668	3.54e-06
AL390838.1	2.30835	2.56e-05
AC091946.1	2.30892	2.61e-05
AC087672.2	2.30926	9.14e-08
U73169.1	2.31106	2.53e-07
LINC02212	2.31146	0.000203316
AC074124.1	2.31264	0.000375252
AC156455.1	2.31333	0.000608827
AC244093.3	2.31388	1.12e-05
AC116366.2	2.31454	1.21e-22
AL160290.2	2.31467	0.00016308
AL358216.1	2.31531	2.45e-07
AL139351.1	2.31809	1.56e-06
AL354950.2	2.31864	3.07e-12
AC017074.2	2.3201	3.71e-11
C12orf77	2.3242	3.33e-07
AL772363.1	2.32435	3.44e-09
AC091705.1	2.3253	9.08e-06
LINC01358	2.32607	0.00401279
AC138207.1	2.32662	9.05e-08
AC020913.1	2.32705	5.8e-06
AC018845.1	2.32901	1.76e-12
AL590666.2	2.32982	6.69e-06
LINC01736	2.33132	1.77e-08
AC026894.1	2.33393	0.000322003
AP000897.2	2.33484	5.26e-05
AC012615.3	2.33545	2.72e-07
AC023906.2	2.33611	7.23e-13
DUXAP8	2.33738	1.17e-07
LINC00705	2.33906	1.99e-06
AL031651.1	2.34016	3.58e-05
AC026412.3	2.34042	2.85e-11
GRPEL2-AS1	2.34093	1.95e-11
AC078864.1	2.34139	5.57e-05
AL356124.2	2.34215	6.28e-13
LINC01256	2.34291	1.58e-08
AC008175.1	2.34317	3.9e-06
AC100830.3	2.34375	2.25e-08
AC096575.1	2.3439	5.11e-10
LINC01426	2.34655	0.00139723
AC092114.1	2.34673	9.67e-07
AL500522.1	2.34745	5.05e-05
AC009495.2	2.34767	1.18e-07
AC090559.2	2.3517	4.66e-08
AP001995.1	2.35221	5.4e-05
AC107886.1	2.35384	8.5e-06
AC016026.1	2.35398	4.45e-05
AL031656.1	2.35438	2.18e-11
LINC01614	2.35453	0.000408445
AP000802.1	2.35757	5.96e-10
AC008735.1	2.35767	1.18e-07
LINC01627	2.35888	1.13e-06
AL450345.1	2.36097	1.61e-06
LINC02263	2.36127	1.29e-05
AC002044.1	2.36207	8.78e-06
AC010261.1	2.36331	0.000131999
LINC00664	2.36444	0.00028863
ITPKB-IT1	2.36538	1.21e-15
AC009276.1	2.36545	5.77e-07
CDRT7	2.36548	3.32e-06
ASAP1-IT2	2.36595	3.35e-06
AL022323.3	2.37122	1.28e-06
CCAT2	2.37257	5.08e-09
AC015911.3	2.37523	2.15e-08
AC079313.1	2.37616	0.000143189
AC002378.1	2.37658	7.82e-05
AC100803.3	2.37892	4.77e-09
AC005323.1	2.37932	0.000115006
AC012184.1	2.37968	6.89e-11
LINC02022	2.38005	2.09e-06
AL355432.1	2.38364	1.63e-07
AC012404.2	2.38542	0.000364759
L3MBTL4-AS1	2.38802	5.05e-05
AC068051.1	2.3882	0.000333726
AC004832.6	2.38906	3.38e-05
AC027237.2	2.3894	1.06e-08
AC092125.1	2.38946	7.11e-13
AC004034.1	2.39529	3.16e-05
AC008060.1	2.39592	6.93e-09
AC048387.1	2.39604	2.03e-08
LINC00906	2.39605	4.52e-08
AC073130.1	2.39626	3.51e-07
LINC01704	2.39644	3.91e-12
AC010519.1	2.39703	3.86e-07
AC113386.1	2.39799	1.11e-15
AC110716.2	2.39941	7.24e-05
AC096947.1	2.40003	0.00048499
AC079054.1	2.40117	1.23e-07
AL356130.1	2.4013	4.48e-12
HOTTIP	2.40344	0.000722422
LINC02241	2.40464	1.07e-08
AC112715.1	2.40477	0.000285675
LINC01146	2.40528	9.8e-15
LINC01090	2.40628	7.48e-10
DEPDC1-AS1	2.40711	6.05e-07
AC013400.1	2.40895	2e-12
AP001094.2	2.41471	0.000585496
AC078795.3	2.41502	1.14e-10
AC084026.2	2.41535	0.000101334
FIRRE	2.418	0.000266991
AC105105.2	2.41969	0.00013795
AC011444.2	2.42292	6.73e-05
LINC01397	2.42315	2.42e-10
AC073912.2	2.42508	2.37e-05
AC009269.3	2.42873	1.7e-11
AC022509.2	2.42979	5.04e-07
C20orf203	2.43284	2.71e-05
AL132656.3	2.43586	1.27e-09
AL354718.2	2.43594	5.48e-11
OR7E47P	2.43685	9.12e-06
AC090617.1	2.43706	8.71e-05
SLC16A1-AS1	2.43778	8.83e-05
AC022126.1	2.43808	1.51e-13
AC097724.1	2.43839	5.95e-09
AC009159.2	2.44068	0.00018353
AC006042.2	2.44112	3.76e-10
AL136097.2	2.44115	6.01e-11
AC078880.2	2.44121	8.34e-08
AL772155.1	2.44173	7.7e-09
LATS2-AS1	2.44897	2.21e-06
AC087286.4	2.44988	8.61e-05
AC079209.2	2.45089	0.000163219
LINC00887	2.45348	1.89e-23
AC008875.1	2.45527	2.96e-05
AC093642.1	2.45672	5.57e-05
AC097375.1	2.45891	4.83e-06
ARHGEF3-AS1	2.46181	0.000592942
AC002306.1	2.4633	0.000452675
LINC02036	2.4645	3.07e-05
AL357558.1	2.46481	0.000305419
AL355483.3	2.4652	7.19e-07
AC116345.1	2.46961	0.00312702
AL353803.1	2.47077	0.00191168
A2ML1-AS2	2.4732	3.46e-10
AP001107.8	2.47469	2.02e-06
AC018685.2	2.47561	0.00137023
LINC02382	2.47565	7.62e-10
AC102945.1	2.47729	4.38e-05
AC245100.6	2.47833	7.63e-11
AC126365.1	2.48013	1.18e-07
AC007216.1	2.48101	0.00010844
AC136475.4	2.48701	4e-06
AC007750.1	2.48764	3.15e-06
AC142086.1	2.48825	5.12e-05
AC004920.1	2.48876	3.09e-06
AC009654.1	2.48886	1.5e-08
AC068025.2	2.48897	2.3e-05
AC069209.1	2.489	2.89e-05
NALCN-AS1	2.48945	9.94e-07
Z94721.1	2.48996	2.96e-06
AC093763.3	2.49029	5.4e-09
LINC01185	2.49088	3.23e-08
AC021744.1	2.4909	1.32e-05
AL365181.2	2.49156	1.47e-09
SLX1A-SULT1A3	2.49282	4.84e-05
LINC00302	2.49424	1.23e-06
AL133480.1	2.49435	1.5e-12
AL137026.1	2.49803	0.000829379
AL353681.1	2.50277	1.7e-10
AC109826.1	2.50316	6.14e-05
AL158168.1	2.50343	4.98e-07
LINC01620	2.50456	3.26e-07
AC007278.1	2.50737	4.15e-07
AC074327.1	2.50883	2.7e-09
AL358332.1	2.50926	2.61e-05
AL591468.1	2.51023	6.04e-14
AC004494.1	2.51383	0.000120479
LINC01163	2.51396	2.92e-07
LINC01234	2.51677	0.000352936
AC127496.2	2.51715	2.68e-14
LINC02439	2.51845	1.02e-11
AC245884.10	2.51854	1.24e-05
AC078883.3	2.51867	0.000100363
AP001107.6	2.52233	7.56e-14
BX571846.1	2.52568	1.41e-06
Z97192.3	2.52667	4.88e-05
LINC02351	2.52715	1.98e-06
VAV3-AS1	2.52716	2.76e-06
AL139420.1	2.52983	4.53e-05
AC004000.1	2.53006	8.4e-07
AC092127.1	2.53046	7.58e-05
DGCR10	2.53112	1.75e-34
AL162724.2	2.53138	5.2e-05
AC113331.1	2.53562	1.67e-09
AL162724.1	2.53709	4.18e-06
AL162293.1	2.53766	6.78e-06
AC037487.2	2.53865	0.000415626
AL136379.1	2.53912	9e-12
FP325330.2	2.54311	3.5e-05
AL713998.1	2.54564	1.64e-07
AP001029.1	2.54667	1.96e-06
LINC01235	2.54977	1.38e-13
AC097534.2	2.55455	9.08e-10
SALRNA1	2.55629	0.000112869
AL162274.1	2.5568	1.27e-05
AC024230.1	2.55726	1.59e-09
KCCAT198	2.56309	1.68e-09
AL136460.1	2.56333	1.53e-07
AC005823.1	2.56681	1.2e-09
LINC01433	2.56721	7.32e-06
AP001257.1	2.56772	2.13e-06
AL360267.1	2.5694	7.61e-08
AL121908.1	2.57081	5.56e-08
AC068992.1	2.57099	8.83e-05
AC140125.3	2.57711	7.5e-06
AL109615.3	2.57729	0.00205425
GS1-594A7.3	2.57742	3.56e-05
AC016027.3	2.57759	7.46e-05
TBC1D3P1-DHX40P1	2.57766	9.52e-09
LINC00529	2.57999	9.65e-05
LINC02390	2.58096	2.72e-05
EGFLAM-AS3	2.58444	8.64e-06
DARS-AS1	2.5862	7.21e-07
AC010768.4	2.5872	7.81e-06
AL731567.1	2.58846	2.62e-06
AL356652.1	2.59026	7.1e-06
AC135050.3	2.59162	1.38e-05
LINC01789	2.59204	4.29e-11
AC013549.1	2.59322	8.41e-14
Z98742.1	2.59324	3.59e-11
AC084876.1	2.59496	4.08e-05
AL021328.1	2.59942	1.21e-13
AC011352.1	2.60138	8.91e-13
AC006145.1	2.60168	0.000140785
AC011462.3	2.60295	1.05e-13
LINC00704	2.60545	4.52e-06
AP002954.1	2.6062	0.00011018
LINC01975	2.60772	1.72e-07
AC104241.1	2.60982	2.85e-12
AC243829.2	2.61005	4.36e-11
AC021351.1	2.61037	3.33e-10
AP000547.2	2.61208	1.18e-08
PRR7-AS1	2.61226	5.93e-05
AP002856.3	2.61242	9.27e-10
AC092783.1	2.61557	1.23e-06
Z97056.1	2.61612	0.000220793
AC008269.2	2.61832	2.57e-09
AL021707.5	2.62043	7.35e-12
AC092143.4	2.62169	1.37e-05
FGF14-AS1	2.62455	0.000255033
AP001999.3	2.62586	2.75e-05
TXNDC12-AS1	2.62599	3.59e-16
VCAN-AS1	2.62628	2.05e-07
AC073486.1	2.62718	0.00261864
TPRG1-AS2	2.62907	9.1e-09
AC073257.2	2.63252	2.61e-10
LINC01271	2.63981	8.97e-10
AC010468.2	2.64001	1.65e-08
SLC7A11-AS1	2.64098	4.24e-05
AC010267.1	2.64261	2.67e-07
LINC00173	2.64285	9.29e-06
AL357093.1	2.65464	1.87e-06
AC007179.1	2.6551	7.83e-05
LINC02446	2.65522	5.05e-09
DPP9-AS1	2.65526	1.63e-33
AC010280.2	2.65529	1.25e-08
AC011611.2	2.66095	1.69e-05
AL021937.3	2.66168	2.07e-05
AL356752.1	2.66193	3.14e-05
AC015660.4	2.66256	9.08e-12
AC007496.2	2.66375	7.28e-06
LINC00475	2.66978	1.9e-11
AC079209.1	2.67018	2.69e-05
LINC02377	2.67684	1.46e-07
LINC02215	2.67711	1.55e-07
AC130469.1	2.6787	2.94e-05
AL807752.4	2.6794	2.05e-06
AL365500.1	2.6799	1.88e-10
AC079336.2	2.68243	1.05e-15
AL513008.1	2.68258	4.61e-06
SNHG12	2.68315	0.00061189
AC006262.2	2.68922	0.000364916
AC008764.3	2.69088	2.71e-05
AC243829.1	2.69317	8.61e-05
AP002075.1	2.69363	3.1e-06
AC007906.1	2.69625	7.74e-07
LINC02100	2.7	3.04e-12
TBX5-AS1	2.70028	2.2e-07
AL132657.2	2.70196	1.23e-09
AC011383.1	2.70358	3.64e-05
AC092675.1	2.70567	1.47e-10
AC010531.4	2.70775	1.04e-10
AL162457.1	2.70933	5.15e-09
AL512641.1	2.7102	1.46e-07
AC004585.1	2.7133	0.00020947
AC093689.1	2.7134	3.04e-05
AP005209.1	2.7145	3.73e-07
AC008067.1	2.7175	4.52e-12
SMILR	2.72032	0.00160172
AL021368.2	2.72076	8.26e-12
LINC02140	2.72174	3.59e-11
AL390115.1	2.72363	3.27e-11
AC079015.1	2.72376	2.55e-11
AC105105.4	2.72751	5.12e-09
LINC02073	2.72844	1.16e-06
AC122719.2	2.7291	6.79e-08
AP003397.1	2.72974	1.9e-09
AC015722.2	2.73319	0.00162164
LINC01832	2.73673	2.88e-05
PSORS1C3	2.73755	0.000543476
AL157402.2	2.73844	0.000503007
AC026719.1	2.74025	3.53e-08
AL591030.1	2.7423	7.86e-05
LINC01943	2.74547	5.26e-06
AC020907.4	2.75083	5.33e-05
AL645939.5	2.75141	4.37e-06
LINC01152	2.75217	0.000428958
AC023669.1	2.75478	0.000676333
AC110716.1	2.75549	1.58e-06
ITGB2-AS1	2.7558	0.000504025
AC124944.3	2.7595	1.09e-09
AC084880.3	2.76	2.62e-06
AL354949.1	2.76219	2.32e-06
LINC01017	2.76412	1.47e-06
AC069437.1	2.76938	4.67e-05
AL596211.1	2.77254	1.59e-09
AP001605.1	2.77301	5.24e-10
AC079907.2	2.77578	1.81e-06
AC023669.2	2.7791	5.47e-10
AC104316.2	2.78327	3.23e-10
AC006262.1	2.78356	8.74e-06
AC079384.1	2.78449	3.42e-09
MACROD2-AS1	2.78581	1.74e-06
AF064858.2	2.78689	0.000777237
AC023024.1	2.78863	1.49e-26
AC004224.2	2.79028	2.03e-06
AC008781.2	2.79158	1.65e-17
AC087501.1	2.79363	1.67e-10
LINC00928	2.7953	0.00017425
LINC01885	2.79648	7.98e-15
AC104985.2	2.80079	8.85e-11
BX276092.9	2.80173	2.05e-07
AC002094.1	2.8036	0.00038424
AP004147.1	2.80463	9.84e-06
AP003100.1	2.80757	3.92e-10
AL078604.2	2.81052	6.5e-05
MIR155HG	2.81055	0.000460567
MIR210HG	2.81279	3.22e-56
AC089983.1	2.81385	6.92e-05
PCGEM1	2.81969	0.00206296
AC110296.1	2.82101	0.000433311
AL031595.2	2.82262	5.31e-06
AC092435.2	2.83278	4.67e-09
AL499616.1	2.83723	5.51e-06
AC108449.3	2.84681	4.95e-06
LINC01595	2.8475	2.64e-11
AL390729.1	2.86423	7.17e-06
AC012645.3	2.86425	1.12e-05
AC008794.2	2.86432	5.69e-07
ABCC5-AS1	2.86434	1.78e-12
AP001458.1	2.86647	6.7e-06
EHD4-AS1	2.86783	6.65e-10
AL031665.1	2.87493	4.43e-11
LINC01956	2.87944	1.73e-07
LINC01021	2.87973	2.74e-06
AC046143.1	2.88013	2.49e-14
AC008991.1	2.88127	1.84e-06
LINC01070	2.8814	6.21e-08
AC019069.1	2.89215	0.00017024
AP002991.1	2.89829	4.14e-08
AF131215.2	2.90078	7.03e-05
AC113398.2	2.902	3.33e-08
LINC00524	2.90211	7.93e-09
LINC00881	2.90738	1.05e-07
AP001783.1	2.90753	1.88e-06
LINC01440	2.90833	0.000379286
LINC01839	2.9108	6.5e-06
AL109924.2	2.91358	5.41e-09
LINC02067	2.91602	4.55e-06
LINC01305	2.91823	3.85e-06
AC093072.1	2.92038	1.86e-13
AC122710.2	2.92087	1.32e-06
AC000067.1	2.9211	8.31e-07
AC087286.1	2.92206	7.12e-06
AC010181.2	2.92292	9.88e-09
AC005944.1	2.92447	7.64e-12
AC002056.2	2.93289	4.94e-06
AL353742.1	2.93542	1.07e-11
LINC00560	2.93838	7.8e-13
AC113346.1	2.94114	0.000411868
AC135388.1	2.94179	1.97e-12
AL050343.1	2.94503	3.53e-12
AKT3-IT1	2.94565	3.67e-10
LINC01675	2.94736	1.05e-05
LINC00544	2.94903	6.33e-06
AC007406.3	2.95553	1.2e-13
AC010463.2	2.9586	1.57e-10
AL133467.4	2.96079	1.46e-06
AC243829.5	2.96117	1.35e-07
AC004988.1	2.96358	9.87e-06
LINC01546	2.96445	2.01e-06
AL162414.1	2.96459	2.22e-07
Z97192.1	2.96484	9.51e-06
AL139339.2	2.96638	6.42e-11
AL669831.3	2.96762	3.63e-08
AC136424.1	2.97031	3.8e-05
LINC00944	2.97168	2.21e-07
LINC01309	2.97199	4.62e-08
AC036108.3	2.97492	2.23e-12
AC012593.1	2.97665	1.33e-05
LINC01929	2.97721	7.67e-05
AC107464.1	2.97875	1.98e-08
AP001010.1	2.97878	2.42e-07
AC073218.2	2.98125	2.65e-07
AC007448.2	2.98527	6.85e-09
AC097478.1	2.98855	8.18e-05
AC109347.2	2.9919	1.39e-22
AL670729.1	2.9947	3.77e-18
AL683807.1	3.00521	1.62e-21
AC096669.1	3.0121	1.91e-08
AC011939.2	3.01361	6.17e-07
LINC01405	3.02103	9.66e-09
AC084117.1	3.02145	6e-08
AF064858.1	3.02174	5.85e-15
AC005291.2	3.02223	1.43e-08
AC087284.1	3.03124	3.57e-06
AC015911.9	3.04342	4.84e-07
LINC02041	3.04691	3.74e-10
AC020908.3	3.04878	2.34e-06
AL451065.1	3.05053	1.75e-06
AP003043.1	3.05164	5.11e-26
AC011754.1	3.05342	1.86e-08
AC019117.2	3.05486	0.00205157
AC005486.1	3.05719	5.37e-12
LINC01501	3.06188	1.05e-07
AL136987.2	3.06216	3.33e-10
LINC01425	3.06257	8.2e-11
LINC02428	3.06709	0.00102598
PICSAR	3.06714	4.36e-07
AC004930.1	3.06949	8.25e-06
AC008011.2	3.07432	8.57e-14
AC107926.1	3.07788	2.2e-07
AC100848.1	3.07942	1.52e-12
AL355816.2	3.0845	6.8e-09
AC108136.1	3.08683	5.81e-11
LINC01655	3.09315	0.000101722
AC078795.2	3.09475	1.91e-05
AC034238.1	3.09593	3.94e-06
AC027701.1	3.09719	2.89e-07
AL590822.1	3.09724	2.21e-05
LINC02342	3.09787	6.51e-07
AC010425.1	3.09907	9.29e-17
AC108463.3	3.10033	7.07e-10
Z99755.2	3.10425	4.83e-12
AL356309.2	3.10457	9.08e-10
LINC02087	3.10674	3.75e-08
AC110799.1	3.10675	7e-08
LINC00942	3.10963	9.18e-08
AC026474.1	3.114	1.53e-07
LINC02152	3.11705	1.29e-05
AL354810.1	3.11896	1.15e-08
AL596094.1	3.12103	1.45e-08
LINC02176	3.12598	3.29e-08
AC099786.1	3.13494	6.35e-10
AC124944.1	3.13522	2.18e-06
AC005838.2	3.13695	1.06e-10
LINC01890	3.1414	2.3e-10
DAPK1-IT1	3.14185	3.6e-05
AC025265.1	3.14214	9.64e-14
AL358334.3	3.14339	1.13e-07
AC004817.4	3.14643	1.53e-08
AC134043.1	3.1465	6.48e-09
LINC00355	3.15389	2.67e-06
AC096729.1	3.16301	0.000130247
AL162741.1	3.16391	2.05e-23
AL390061.1	3.16406	7.82e-06
AL080314.1	3.16928	7.14e-16
AC012676.4	3.17526	7.68e-18
ELOVL2-AS1	3.18023	3.39e-06
AP000525.1	3.18148	5.01e-11
AC025434.1	3.19452	8.48e-06
LINC01033	3.19584	4.01e-06
AC005520.5	3.19698	1.11e-05
LINC01732	3.1997	1.08e-07
LINC01615	3.20155	1.72e-06
LINC00487	3.20371	1.66e-30
AC018742.1	3.20532	0.000152043
AL139161.2	3.20569	4.74e-07
AC022509.1	3.20845	1.27e-20
AC073941.1	3.20939	5.51e-07
LINC02257	3.22102	0.000159101
PLSCR5-AS1	3.23345	1.62e-05
AC105118.1	3.23769	2.74e-06
AC018695.6	3.23964	7.6e-18
AC125603.4	3.24414	4.33e-07
AC097717.1	3.24449	3.31e-18
AC023796.1	3.24542	7.67e-10
AC010745.1	3.24727	7.78e-07
AC083806.3	3.25052	2.29e-10
AL592431.1	3.25099	7.46e-08
LINC01281	3.25301	7.44e-08
NLGN4Y-AS1	3.25417	5.06e-09
AP001995.2	3.25653	2.63e-07
AL138930.1	3.26087	3.38e-07
DOCK4-AS1	3.26134	7.21e-06
AC026368.1	3.2617	5.71e-17
AC122710.3	3.26204	4.32e-07
LINC02106	3.26343	4.65e-06
FP236383.3	3.26439	0.000199223
AP002518.1	3.26508	3.36e-08
AC079584.2	3.27715	4.76e-07
LINC00428	3.29062	1.75e-06
AC133644.2	3.29092	1.39e-06
WASF3-AS1	3.29149	1.82e-15
LINC00588	3.29828	8.78e-06
LINC00706	3.29958	9.21e-07
RAPGEF4-AS1	3.30084	1.84e-07
AP006295.1	3.30455	1.35e-06
AL138962.1	3.30481	5.42e-14
LINC00922	3.30844	3.93e-10
AC090023.1	3.30995	2.13e-08
AC006065.4	3.31399	1.55e-05
AC025580.3	3.31422	8.26e-08
AC008649.1	3.31439	2.82e-08
AC073521.1	3.31822	1.49e-14
AL590422.1	3.32466	3.63e-08
LINC02188	3.32468	5.12e-05
LINC01194	3.33238	7.23e-10
AC090337.1	3.34303	5.52e-07
AC012568.1	3.34377	3.27e-07
AC097521.2	3.34775	1.16e-05
AC254629.1	3.35218	7.03e-07
AC131182.1	3.35836	8.97e-06
AL583722.1	3.36193	1.99e-20
AC020907.1	3.37062	4.52e-05
AC138869.2	3.37342	1.99e-08
AC136424.2	3.38099	1.08e-08
AF064858.3	3.38681	2.28e-09
AC011933.2	3.38734	3.24e-06
AC100849.2	3.39528	3.67e-10
DGCR9	3.4009	1.69e-10
AC006148.2	3.40986	1.31e-05
AC068397.1	3.41519	4.33e-13
AL450322.1	3.41847	1.41e-08
AC009133.3	3.42016	1.71e-18
C2-AS1	3.4249	4.06e-06
AP001059.2	3.43069	9.92e-07
AL031587.3	3.44019	1.55e-10
AC008894.2	3.44082	1.28e-14
AC005522.2	3.44116	1.07e-11
LINC00299	3.44245	6.94e-09
AC011287.2	3.44436	4.88e-12
AC074389.3	3.44571	1.22e-07
AP003059.1	3.44983	1.84e-23
AC083843.1	3.45595	4.72e-13
AC093802.2	3.45894	5.15e-07
AP004247.2	3.459	2.09e-08
AC139769.2	3.46017	5.27e-05
AC090696.1	3.46109	3.6e-13
NLGN1-AS1	3.46564	6.42e-11
AC122719.1	3.46714	3.37e-06
AC093915.1	3.46901	7.27e-06
AL603832.2	3.47871	2.03e-08
AC020934.1	3.48098	1.99e-17
AC104619.2	3.48369	1.12e-09
AC004906.1	3.48934	5.58e-08
LINC01738	3.50025	7.12e-06
AC015727.1	3.50444	9.01e-15
AC062039.1	3.50953	3.83e-10
AP005131.5	3.51512	1.95e-06
AL158154.2	3.5192	2.22e-17
AL136038.3	3.52497	6.99e-11
AC024023.1	3.52778	2.35e-06
AL391095.2	3.52856	6.91e-05
GAS6-AS1	3.5336	2.29e-05
AC074366.1	3.53404	6.92e-09
AP005131.4	3.53716	1.21e-06
AC114737.1	3.53889	1.1e-17
AC064834.1	3.54057	2.19e-10
AL121790.2	3.55819	5.19e-16
AC092115.2	3.56162	1.1e-07
AP001150.1	3.56448	2.47e-08
C17orf77	3.56813	1.22e-10
AC008105.3	3.57578	1.24e-12
AL354861.2	3.57798	1.67e-10
AC008750.1	3.58268	3.19e-15
AL161907.1	3.58293	2.26e-13
AC002398.1	3.58779	2.07e-20
AC078906.1	3.59141	7.4e-16
AL096799.1	3.5916	5.53e-06
LINC01947	3.5975	4.65e-09
AC021087.4	3.60222	6.16e-06
BX322557.2	3.60872	3.62e-11
AC133785.1	3.61496	4.48e-07
AC021818.1	3.61611	1.48e-08
KCNMA1-AS1	3.62224	8.95e-08
AC136475.3	3.62407	5.77e-05
AC122134.1	3.63248	1.77e-06
AP001972.4	3.63722	1.02e-10
AC026355.2	3.64078	2.85e-10
KCNMA1-AS3	3.64158	1.55e-06
LINC01700	3.64817	4.53e-07
AC005592.1	3.65062	1.18e-08
AL035541.1	3.66422	2.77e-15
LINC01822	3.66441	7.82e-07
LINC01077	3.68039	1e-08
AL359853.1	3.68399	2.17e-10
AC004471.2	3.69526	1.54e-15
AL109811.1	3.69801	6.92e-14
HULC	3.7003	8.49e-19
AC116565.1	3.70508	4.95e-10
AC007991.4	3.71047	5.57e-08
AC091020.1	3.71316	2.16e-09
AC245041.3	3.72306	8.09e-06
AC090164.2	3.726	1.46e-07
AC104984.6	3.72971	2.74e-07
AP005233.2	3.73469	1.63e-15
LINC02195	3.73746	6.18e-08
LINC02154	3.73855	1.32e-05
AC096576.2	3.74681	1.11e-15
AC008609.1	3.75275	4.94e-10
AL023584.2	3.75861	2.11e-13
AC008601.1	3.76077	1.2e-07
AL513303.1	3.77091	2e-10
MIAT	3.77312	2.7e-05
AC137579.1	3.77786	2.81e-16
AC011352.3	3.78879	5.17e-05
AP000844.2	3.79227	1.14e-07
AC074050.3	3.79508	4.43e-12
AC092490.2	3.79834	6.19e-11
AL136317.2	3.80194	3.49e-07
LINC00460	3.81521	3.39e-05
FP671120.3	3.8202	8.53e-05
LINC02099	3.82765	4.05e-08
AP001180.4	3.83732	2.68e-09
AP000864.1	3.83775	2.35e-07
LINC02348	3.84575	2.76e-27
AC245041.2	3.84711	1.03e-09
LINC01192	3.85204	4.04e-09
AC136601.1	3.86425	3.78e-12
CDKN2B-AS1	3.86702	5.82e-08
AL358215.1	3.90789	1.59e-09
AL391415.1	3.90878	4.58e-10
AC097713.1	3.91058	5.68e-10
IL20RB-AS1	3.91559	5.7e-10
AC008794.1	3.9197	6.01e-13
AC007785.1	3.92053	9.61e-17
HIF1A-AS2	3.92082	1.26e-06
LINC02081	3.9536	1.31e-09
AC105105.5	3.96441	4.14e-08
LINC01611	3.98158	5.68e-09
TTC21B-AS1	4.0081	5.06e-26
AL357507.1	4.02107	9.45e-08
Z98257.1	4.03026	3.75e-07
ATP11A-AS1	4.03167	2.39e-08
EGFR-AS1	4.06785	2.22e-05
AL355102.1	4.08899	8.95e-13
AC125613.1	4.13258	2.35e-09
AP000797.3	4.1421	2.51e-07
LINC00158	4.15739	1.91e-13
LINC01632	4.15765	7.03e-09
SIRPG-AS1	4.17835	2.08e-12
AL031593.1	4.20051	1.09e-05
AL450322.2	4.22427	6.32e-09
LINC01667	4.23588	4.62e-08
AC106895.1	4.24591	2.57e-19
AC013391.3	4.25297	3.33e-07
MYLK-AS2	4.27304	4.09e-07
AC009084.1	4.28453	4.6e-09
FOXN3-AS2	4.28778	3.73e-09
AC079601.1	4.28841	3.64e-09
AL391845.2	4.2898	1.96e-15
AC022239.1	4.30342	1.49e-08
AC018362.2	4.30861	4.36e-15
AL358394.1	4.31371	6.69e-07
LINC00879	4.31695	5.17e-11
AC079760.2	4.32519	9.99e-19
AL135923.2	4.32716	2.55e-13
AL513164.1	4.33351	4.68e-08
GACAT2	4.33926	1.99e-08
AC243829.4	4.3584	3.86e-11
FAM66A	4.37072	7.23e-13
AC005291.1	4.38278	2.56e-06
AC105935.1	4.38379	1.94e-21
AC130456.3	4.38825	1.06e-17
EGLN3-AS1	4.40407	2.57e-09
AC106744.2	4.40446	2.84e-11
AC009120.6	4.40707	2.44e-20
AL359873.1	4.42504	8.83e-13
AP005137.2	4.42793	5.96e-15
LINC01905	4.43374	2.24e-12
AFAP1-AS1	4.44203	1.01e-06
AL592528.1	4.45193	1.83e-07
AC044781.1	4.45348	2.1e-10
AC006206.1	4.45667	3.1e-20
MMP2-AS1	4.46183	5.47e-08
AC008760.2	4.47683	2.35e-06
AL034546.1	4.4808	6.02e-12
AC084026.1	4.50858	5.04e-09
AP003121.1	4.52699	3.2e-16
LINC02310	4.53157	3.27e-09
AC217774.1	4.53803	1.42e-16
SFTA1P	4.53958	8.51e-11
AL162457.2	4.54233	4.96e-08
STPG2-AS1	4.54495	8.2e-11
AC004852.2	4.56278	1.25e-06
AP003717.1	4.56283	1.94e-13
LINC02024	4.56298	2.66e-11
AL109615.2	4.58625	1.9e-09
LINC02473	4.60238	5.49e-16
AL732314.4	4.61948	2.49e-15
LUCAT1	4.65836	3.62e-08
AC068492.1	4.67301	3.99e-12
AC073324.2	4.68613	1.26e-10
AC092436.4	4.69039	3.57e-16
AC002347.2	4.69314	3.28e-21
LINC02048	4.70167	3.4e-13
AC005550.3	4.73857	2.04e-06
IGFL2-AS1	4.7498	3.95e-07
LSINCT5	4.76224	6.1e-10
AL355578.1	4.77802	4.13e-13
AL023802.1	4.78601	9.65e-08
RMRP	4.83286	7.74e-06
AC004817.3	4.87083	2.62e-09
AC021534.1	4.88855	2.16e-07
AL390866.1	4.90419	4.28e-10
ATP13A5-AS1	4.90507	5.15e-11
AL109924.1	4.95293	4.05e-08
DSCAM-AS1	4.95757	1.76e-08
LINC02192	4.99024	9.4e-12
AL355834.1	4.99145	2.9e-11
LINC01419	4.99473	3.12e-06
CASC6	5.01364	2.98e-08
AC002384.1	5.02663	1.85e-06
AC103925.1	5.10025	1.13e-06
AC006482.1	5.17851	1.44e-12
AC093001.1	5.1789	4.19e-08
AC108025.2	5.29262	5.06e-12
AC005482.1	5.32402	1.74e-06
LINC02223	5.36906	1.53e-07
AP000439.3	5.38486	1.6e-08
AC073115.1	5.41562	1.48e-11
PRICKLE2-AS1	5.43672	1.38e-28
AC008060.4	5.44518	2.39e-08
TTTY5	5.44861	3.76e-11
AL034399.2	5.46484	5.99e-13
RMDN2-AS1	5.47015	4.09e-21
BX470209.2	5.57842	8.36e-16
LINC01219	5.6079	6.99e-15
PRRT3-AS1	5.78235	2.09e-16
AC005821.1	5.78382	1.06e-20
AC015977.2	5.85427	4.6e-12
LINC01893	6.13644	8.98e-10
AC016723.1	6.13958	1.42e-17
AC090568.2	6.26434	4.81e-08
AC091096.2	6.33484	5.92e-20
AC126121.2	6.34077	4.13e-10
AC083967.1	6.3842	5.81e-11
AC113410.2	6.51772	6.15e-08
AL590644.1	6.91675	7.24e-11
OSTM1-AS1	7.8356	4.34e-21
AC079466.1	10.149	2.63e-11
AC016550.1	11.1919	8.12e-25
