# Supplementary material for: Long non-coding RNA LINC01234 regulates proliferation, migration and invasion via HIF-2α pathways in clear cell renal cell carcinoma cells
Source: PeerJ. 2020 Oct 14;8:e10149. doi: 10.7717/peerj.10149 (PMC7568479; doi:10.7717/peerj.10149)
Supplement: Supplemental Information 3 — A total of 323 statistically significant lncRNAs were considered to be related to the prognosis by the univariate cox regression. [file peerj-08-10149-s003.xlsx]

## Sheet: Sheet1
lncRNAname	HR	P
LINC01956	1.2293	4.97803e-09
LINC00524	1.2591	8.88929e-09
AC245041.2	1.2036	2.34535e-08
LINC01234	1.12307	3.74878e-08
LINC01885	0.804434	2.31421e-07
AC018695.6	1.22032	2.48668e-07
AC138305.2	1.26453	2.72718e-07
AL357507.1	1.19797	4.17235e-07
AC092490.2	1.23271	1.08348e-06
LINC00845	0.749301	1.59638e-06
AC009654.1	1.25434	2.06619e-06
IL20RB-AS1	1.21753	2.79723e-06
AL358876.2	1.30369	3.16675e-06
AC005291.1	1.2892	3.83251e-06
AL390115.1	1.22724	6.69021e-06
AC092484.1	1.22909	7.01795e-06
AC103925.1	1.21475	7.63454e-06
AC112715.1	1.26815	9.76544e-06
AC006058.3	1.23011	1.59212e-05
LINC01522	1.16852	1.70806e-05
AC002384.1	1.09444	2.20955e-05
AL391095.2	1.14612	2.43155e-05
PROX1-AS1	1.19151	3.25e-05
AL136987.2	1.24955	3.29146e-05
AC004264.1	1.18077	4.73103e-05
AC012615.3	1.39454	4.88556e-05
AC002398.1	1.13171	7.96571e-05
AC116565.1	1.22587	0.000135125
HOTTIP	1.16679	0.000138221
LINC00942	1.11559	0.000146181
LINC01620	1.27664	0.000164667
LINC02257	1.15015	0.000173434
AC245041.3	1.12303	0.000197075
LINC00460	1.08928	0.000205214
AC007785.1	1.17189	0.000209456
AC089983.1	1.22541	0.000230055
U62317.5	1.15296	0.000248948
LINC01893	1.1471	0.000265485
AP000697.1	1.44042	0.000275041
AP001783.1	1.19535	0.000280838
AC012236.1	1.13204	0.000296412
PVT1	1.3044	0.000322031
AL162457.2	1.20458	0.000346048
AP003062.1	1.1866	0.000371835
LINC01405	1.16973	0.000376828
WT1-AS	1.11896	0.000451211
AC007938.1	1.22397	0.000456549
LINC01655	1.16528	0.000481195
AC122710.3	1.1731	0.000501097
AC023906.2	1.26246	0.000521905
AC113346.1	1.13492	0.000537267
AL050327.1	1.21539	0.000562039
AC084866.1	0.890383	0.000676082
TBX18-AS1	1.20518	0.000750425
MAFA-AS1	1.13977	0.000773378
MUC2	1.19664	0.000785972
LINC02154	1.10152	0.000912327
AC105118.1	1.12739	0.00092193
AC013391.3	1.12394	0.00093083
AC026474.1	1.19724	0.00102992
LINC00928	1.16244	0.00105302
NALCN-AS1	1.15573	0.0011109
ABCC5-AS1	1.18907	0.00115025
AC245100.6	1.1289	0.00116903
AC093001.1	1.09677	0.0011849
LINC02081	1.11883	0.00123433
LINC01146	1.13675	0.00125984
AL136097.2	1.18136	0.00127635
AL390866.1	1.12849	0.00131606
AC005291.2	1.24234	0.00136028
LINC01271	1.12315	0.00136493
AP000547.2	1.2394	0.00139602
AP000525.1	1.11686	0.00174074
LINC01684	0.917018	0.00175287
IGFL2-AS1	1.1106	0.00179749
AC093763.3	1.25216	0.00194138
AC097724.1	1.18334	0.00197097
AL080314.1	1.11368	0.00197921
AL669831.3	1.12497	0.0020095
LINC01589	1.1292	0.00204105
AC008060.1	1.11825	0.00205434
AC024023.1	1.15817	0.00211761
AC134043.1	1.23349	0.00214894
AC012645.4	1.11198	0.00225367
AC008060.4	1.11419	0.00234032
LINC01833	1.1304	0.00248418
AC068992.1	1.15809	0.0024929
LINC01281	1.13229	0.00257009
LINC02362	1.1051	0.00273725
AL139420.1	1.17079	0.0027424
TTTY5	1.19394	0.00279243
AL136984.1	1.14974	0.00279418
AL160290.2	1.12408	0.00285929
AL136311.1	1.13253	0.0029992
ELOVL2-AS1	1.15934	0.00302388
AL133320.1	1.21496	0.00308918
AC009269.3	1.17863	0.00314055
LINC02428	1.18418	0.0031497
LINC02195	1.12784	0.00318483
AP003121.1	1.14828	0.00322422
AC020913.2	1.16889	0.00326073
LINC01571	1.1635	0.00341403
AL450345.1	1.17528	0.00347088
AC006441.4	1.16577	0.00347694
AC007728.3	1.188	0.0035782
ATP13A5-AS1	1.08565	0.00361725
LINC02100	1.12428	0.00362117
AC105446.1	1.08095	0.00374143
LINC01559	1.0506	0.00384461
AP004147.1	1.14192	0.00410887
DEPDC1-AS1	1.20265	0.00419402
DSCAM-AS1	1.12797	0.00437251
FIRRE	1.08381	0.00442866
AL356124.2	1.17995	0.00444285
AC004000.1	1.11298	0.00446173
AC126365.1	1.09572	0.00470555
Z98257.1	1.08684	0.00492451
AC005785.1	1.08821	0.00503036
AC133644.2	1.07236	0.00509086
AC068870.2	0.860922	0.00521237
AC092115.2	1.08601	0.00531473
AL450313.1	1.26673	0.00535547
AC009276.1	1.22119	0.0056596
SMILR	1.14797	0.00570905
AC025434.1	1.13805	0.00582507
AC008750.1	1.11827	0.00599138
AP000844.2	1.08796	0.00603608
LINC02223	1.1973	0.00610501
AC012676.4	1.11935	0.00620768
AC097521.2	1.08973	0.00623573
AC004817.3	1.08452	0.00636286
AC100848.1	1.16607	0.00655636
AC007750.1	1.09889	0.0068278
AP003043.1	0.876011	0.00685253
AC005253.1	0.891779	0.00702685
AC092332.1	1.18627	0.00704888
ARHGAP26-IT1	1.17538	0.00705258
RMRP	1.17675	0.00708111
TPRG1-AS2	1.23161	0.00712457
AC011352.1	1.09694	0.00719282
LINC00704	1.08959	0.00742358
AL928921.1	0.861119	0.00744366
AC092143.4	1.11024	0.0075207
AL021707.5	1.17903	0.00759687
LINC01632	1.14389	0.00764899
AL645939.5	1.10685	0.0077542
AP001972.4	1.12527	0.00779922
AC091020.1	1.14933	0.00784497
AP001599.1	1.19406	0.00785981
AC073324.2	1.08257	0.00816033
AL133330.1	1.10354	0.00826343
LUCAT1	1.05069	0.00838454
LINC01260	1.08036	0.00856194
AL133255.1	1.12105	0.00878034
AC005522.2	1.18273	0.00891519
AC254629.1	1.0894	0.009145
AL451062.1	1.07283	0.00916473
LINC02087	1.1873	0.00964114
AC008105.3	1.06089	0.00977473
AC025253.1	1.12973	0.00978866
AC021534.1	1.21241	0.0101045
LINC02067	1.10411	0.0102836
AC108449.3	1.21533	0.0103121
AC092720.2	1.23528	0.0103221
AL355578.1	1.1242	0.0103237
AC026991.1	1.21041	0.0103701
AL355102.4	1.07947	0.0103743
AC079336.2	1.10119	0.010514
AP001107.6	1.15999	0.0105199
AC009139.1	1.12959	0.0107137
AC006262.1	1.08059	0.0107717
AC024230.1	1.12331	0.0108669
AL162414.1	1.13315	0.01093
AL513164.1	1.10265	0.0111035
LINC01979	0.929258	0.0118704
ARHGEF26-AS1	1.11993	0.0120427
AC105105.4	1.09618	0.0121606
AC078906.1	1.09443	0.0125472
AC078883.1	0.883523	0.0129879
AC084026.1	1.13536	0.0131589
AC008764.3	1.12476	0.0132721
AP001029.1	1.11231	0.0133101
AC016383.1	0.719803	0.0133628
AP001381.1	1.10579	0.0135491
LINC01192	1.15876	0.0137948
AC002378.1	1.15737	0.013922
CCAT2	0.942447	0.0139419
C2-AS1	1.09457	0.014034
AL591468.1	1.10746	0.0146631
LINC02446	1.07403	0.0149346
LINC01975	0.945538	0.0151766
AC092813.2	1.14787	0.0153957
AC002306.1	1.11913	0.0158762
LINC01615	1.06258	0.0159513
AC004817.4	1.1229	0.0163119
AP006333.2	0.740764	0.0165401
LINC02106	1.15458	0.0171771
SLC7A11-AS1	1.12838	0.0171827
AC090696.1	1.19554	0.0175502
LINC00158	1.07449	0.0175783
AP005233.2	1.07089	0.0176072
HULC	1.09931	0.0180502
AC044781.1	1.11057	0.0182562
LINC00461	1.10237	0.018434
LINC01667	1.13641	0.01848
AC241644.2	0.877113	0.01882
AL139280.1	1.14878	0.0188836
LINC01332	0.966755	0.0188927
AC096729.1	1.06555	0.0189445
AC032011.1	0.91624	0.0190182
AC078955.1	1.09199	0.0191946
AC011891.1	0.932803	0.0193081
AP001605.1	1.10136	0.0194252
AC011700.1	1.17624	0.0195464
LINC00864	1.13768	0.0196782
AC087284.1	1.08707	0.0197343
AC090709.1	0.848133	0.0200301
LINC01675	1.11706	0.0200822
AL138963.1	1.11322	0.0202205
AL731567.1	1.06939	0.0202869
AL078604.2	1.05863	0.0206005
AC084876.1	1.06957	0.0206028
AL117382.1	1.13372	0.0211167
AC025265.1	1.06589	0.0212604
MIR663AHG	1.16078	0.0214493
AC018845.1	1.15465	0.0217002
AC090023.1	1.17915	0.0219755
AC243773.2	1.06818	0.0223565
AC005823.1	1.14499	0.0228197
AC109446.3	1.09086	0.0230195
LINC01748	1.11754	0.0230625
AL590644.1	1.04025	0.0230957
ASAP1-IT2	1.07003	0.0233134
AC012668.3	1.14524	0.0234733
FP236383.3	1.1505	0.0235647
AC073370.1	1.11353	0.0239616
LINC00944	1.04757	0.0241908
AC138969.3	1.12163	0.0243543
AC243829.2	1.10618	0.0245899
AL357314.1	1.08291	0.024782
AC008875.1	1.07537	0.0255847
AC012184.1	1.15312	0.0257738
C1orf147	1.0933	0.0259025
AC016773.1	1.0621	0.0260145
AC099506.1	1.15414	0.0262132
AL158071.3	0.934462	0.0273818
AL450306.1	1.10702	0.0275669
AP001099.1	1.10127	0.0278005
AC091976.1	1.14515	0.0281657
AL358334.3	1.09781	0.0287479
AC005550.3	1.08588	0.0290405
AP000851.2	1.08662	0.0292037
LINC00473	1.0608	0.030148
TSPEAR-AS2	1.08638	0.0302717
AC099552.3	1.29923	0.0304552
AC079313.1	1.07522	0.0306578
AP000696.1	1.10917	0.0309077
AC011939.3	0.942477	0.0310543
AL683807.1	1.09282	0.0311692
AC108025.2	1.10052	0.0312528
AC006065.4	1.10508	0.0315296
AP000797.3	1.07969	0.0318719
LINC02417	1.09516	0.0320495
C20orf203	1.07156	0.0325238
AL136317.2	1.09854	0.0325313
AC096575.1	1.10597	0.0326668
AF064858.1	1.06631	0.0328427
AC095060.1	1.21503	0.03313
AP003469.2	1.07996	0.0333007
CCDC39-AS1	0.869336	0.0334962
VCAN-AS1	1.0875	0.0338892
AP001150.1	1.11584	0.0339182
AL157871.2	1.06647	0.0342639
AC002044.1	1.09868	0.0342795
AP003717.1	1.05657	0.0343192
AC092436.4	1.10122	0.0343666
AC006116.4	0.906072	0.0345072
AC093072.1	1.13512	0.0346828
AC036108.3	1.07415	0.0350974
AC074327.1	1.08032	0.0352191
LINC00551	0.896481	0.035331
AC005323.1	1.12732	0.0363054
LINC00982	0.925523	0.0363653
AC110015.1	1.10031	0.0366841
AC068196.1	1.09602	0.0371246
AC137794.1	1.13477	0.0372774
AC005692.1	1.10561	0.0377847
AC007991.4	1.07077	0.0379293
LINC00355	1.14583	0.0382173
AC133785.1	1.12248	0.038251
MYLK-AS2	1.08129	0.0382571
AC011462.3	1.11354	0.0383279
AC018742.1	0.953647	0.0388411
WSPAR	1.20464	0.0389263
AC020934.1	1.12961	0.0389752
PTPRVP	1.0639	0.0393077
AC005387.1	1.07822	0.0398172
ANKRD44-IT1	1.0945	0.0403106
AC069437.1	1.12707	0.0406336
LINC01305	1.11682	0.0409981
AC011389.2	1.09168	0.0413195
AC156455.1	1.03852	0.0414354
AC004906.1	1.09942	0.0425564
LINC02211	1.12181	0.0431891
AC073257.2	1.06204	0.0433254
AC037487.2	1.12504	0.0435512
AC090673.1	0.916197	0.043736
DUXAP8	1.04782	0.0441841
AL133163.2	0.949714	0.0442299
AL121852.1	1.08361	0.0446004
U73169.1	1.0928	0.045135
LINC00528	1.05615	0.0453825
AC068726.1	1.11593	0.0454537
AC010468.2	1.15392	0.045512
AC013400.1	0.933682	0.0462312
FP671120.3	1.11498	0.0464408
SSTR5-AS1	1.08236	0.0467263
LINC01627	1.17488	0.0467307
AC097717.1	1.07353	0.0481153
HM13-IT1	1.06133	0.0481483
AL162293.1	1.11142	0.0484441
AFAP1-AS1	1.04303	0.0495849
AC016526.1	0.900077	0.0498669
